# Supplementary material for: Quantum resonances and roaming dynamics in formaldehyde photodissociation
Source: Royal Society of Chemistry journal article supplement (doi:10.1039/d2fd00050d), 2022-01-01
Supplement: d2fd00050d1.pdf [file d2fd00050d1.pdf]

## Electronic Supplementary Material for Faraday Discussions

### Quantum resonances and roaming dynamics in formaldehyde photodissociation

Casey Foley, †,<sup>a</sup> Changjian Xie <sup>b,c,\*</sup> Hua Guo<sup>c</sup> and Arthur G. Suits <sup>a,\*</sup>

---

<sup>a</sup> Department of Chemistry, University of Missouri, Columbia MO 65211 USA

<sup>b</sup> Institute of Modern Physics, Shaanxi Key Laboratory for Theoretical Physics Frontiers, Northwest University, Xian, Shaanxi 710127, China

<sup>c</sup> Department of Chemistry and Chemical Biology, University of New Mexico, Albuquerque, New Mexico 87131, USA

† Current address:

\* [xcjscu@126.com](mailto:xcjscu@126.com), \* [suitsa@missouri.edu](mailto:suitsa@missouri.edu)

#### Contents

Fig. S1 Photofragment excitation spectra for  $2^14^1$ ,  $2^24^3$  and  $2^15^1$  bands.

Fig. S2 DC sliced velocity map images from which translational energy distributions were obtained.

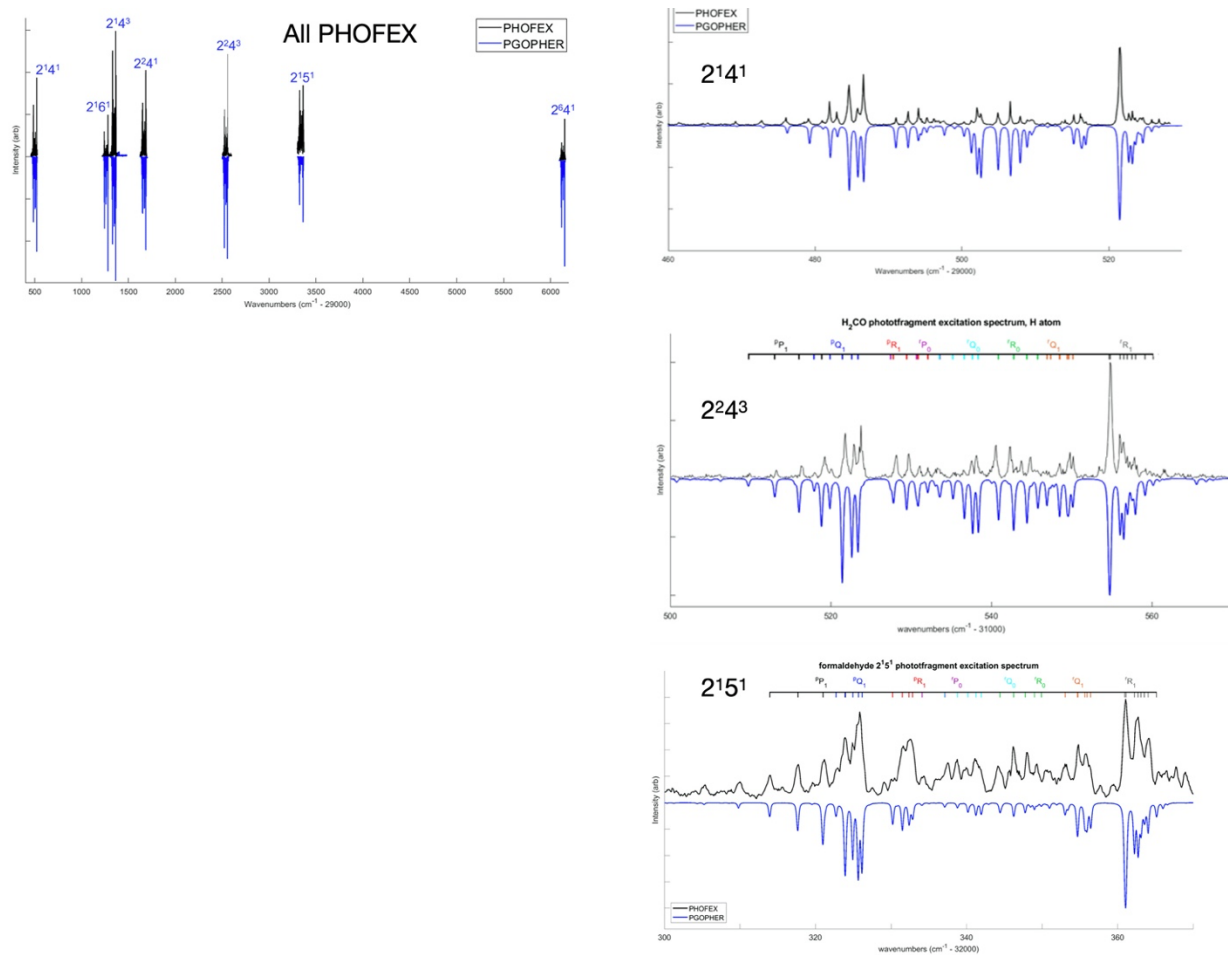

Fig. S1. Photofragment excitation spectra obtained on indicated vibrational band and probed species.

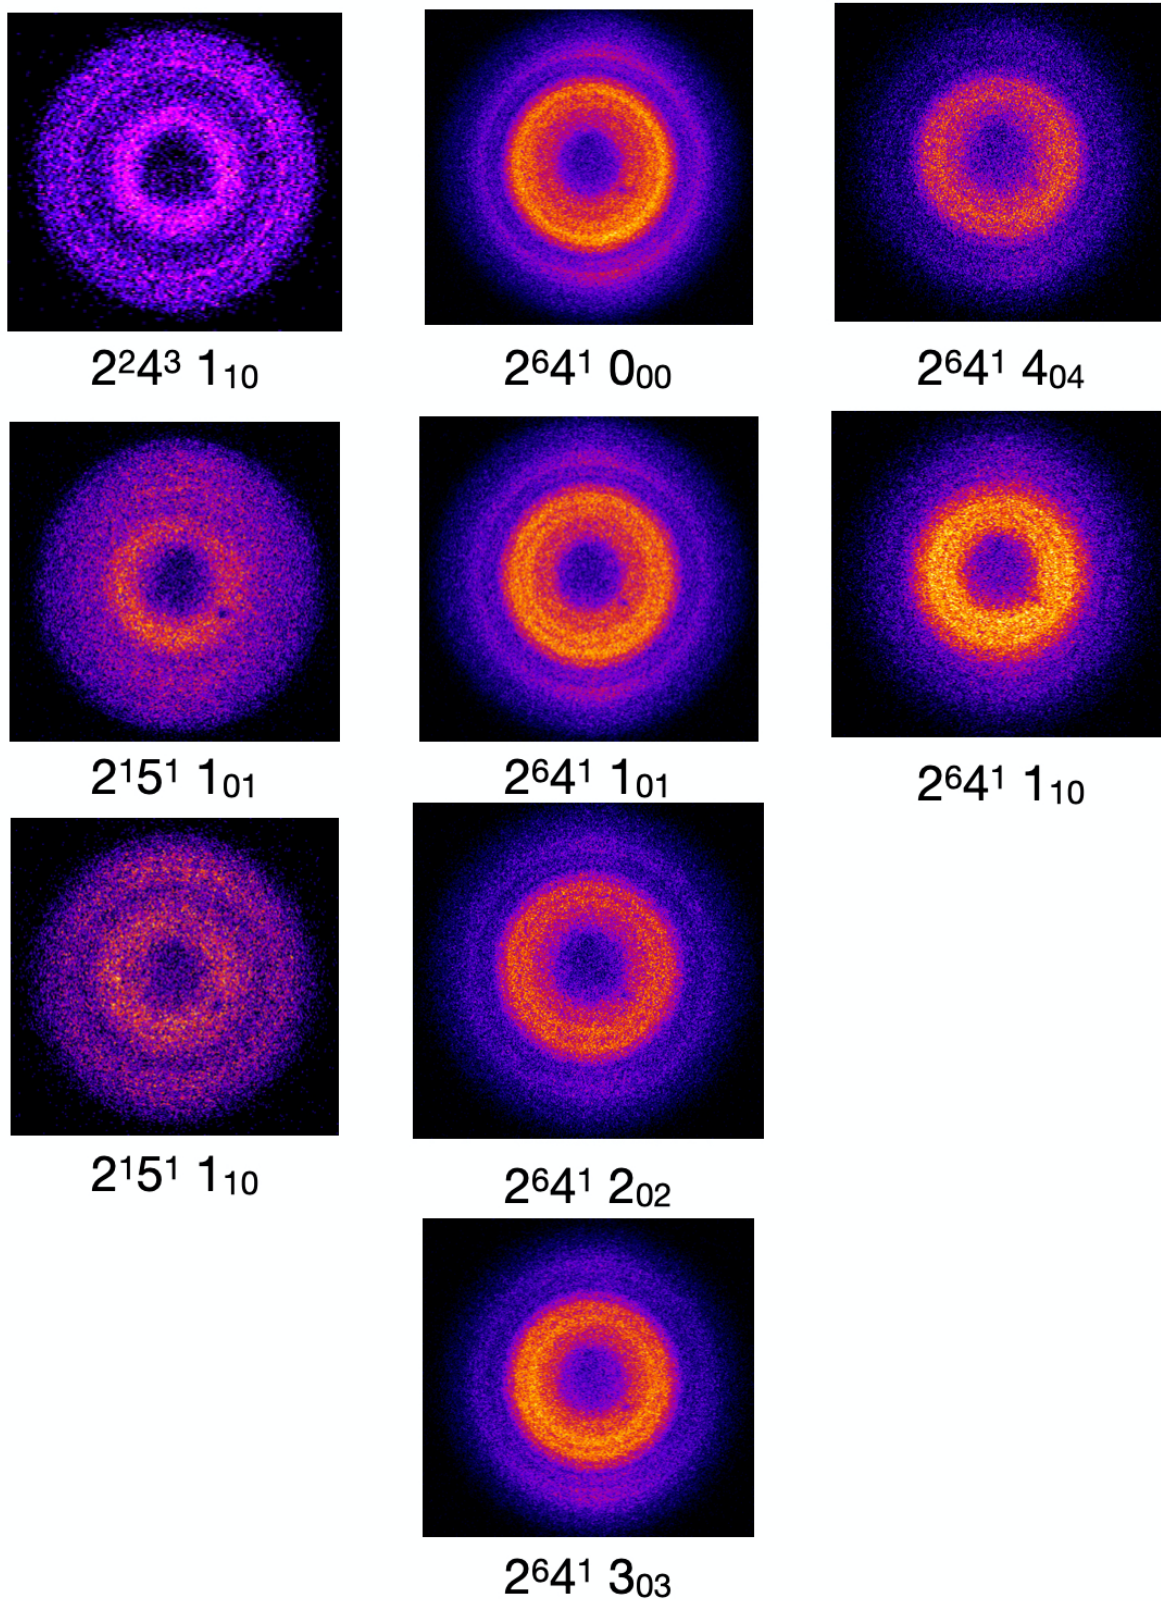

Fig. S2. DC sliced velocity map images from which TEDs were obtained.
